# Supplementary material
Source: publisher site journal article supplement (https://www.dovepress.com/article/305595)
Supplement: Supplementary file 1 [file get_supplementary_file.php]

**Supplementary Figures**

**
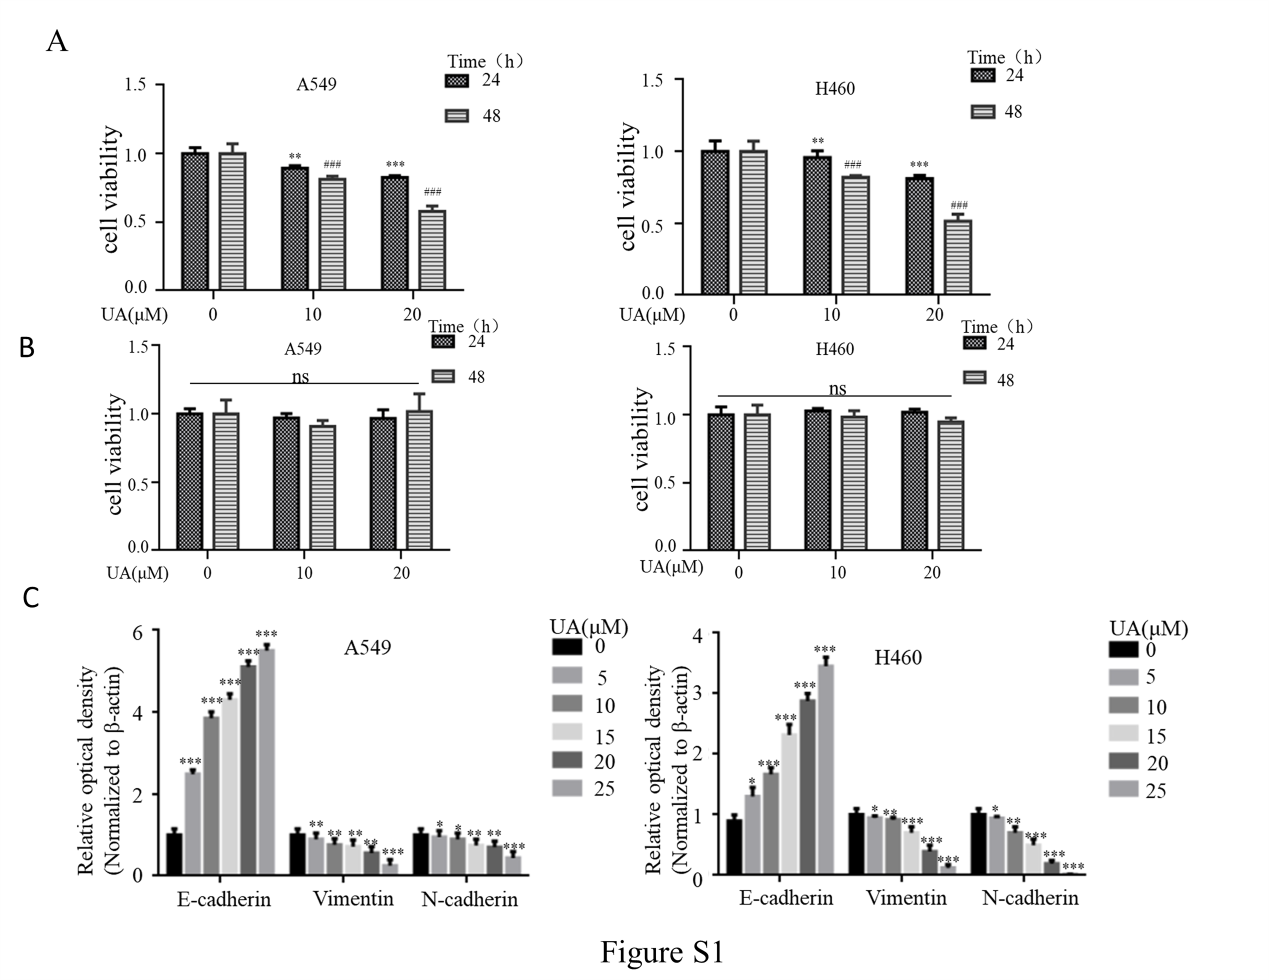
**

**Figure S1. Quantitative analysis of Figure 1 Western blotting results, and Results of MTT assay**

(A) Cells were treated with indicated concentrations of urolithin A, and cell viability was determined by MTT at 24 h or 48 h time point. (B) Cells were pretreated with urolithin A (0, 10, 20μM) for 5 h, and then the medium was aspirated. MTT assay was used to detect cell viability after 24h or 48h of continuous culture. The bars represent the mean±S.D. of triplicates,*p＜0.05, **p＜0.01, ***p＜0.001. (C) Related to Figure 1D. Quantitative optical density analysis of the E-cadherin, Vimentin and N-cadherin by treated with urolithin A for 10 h on A549 and H460 cells. The bars represent the mean±S.D. of triplicates,*p＜0.05, **p＜0.01, ***p＜0.001. ns means no statistical difference.


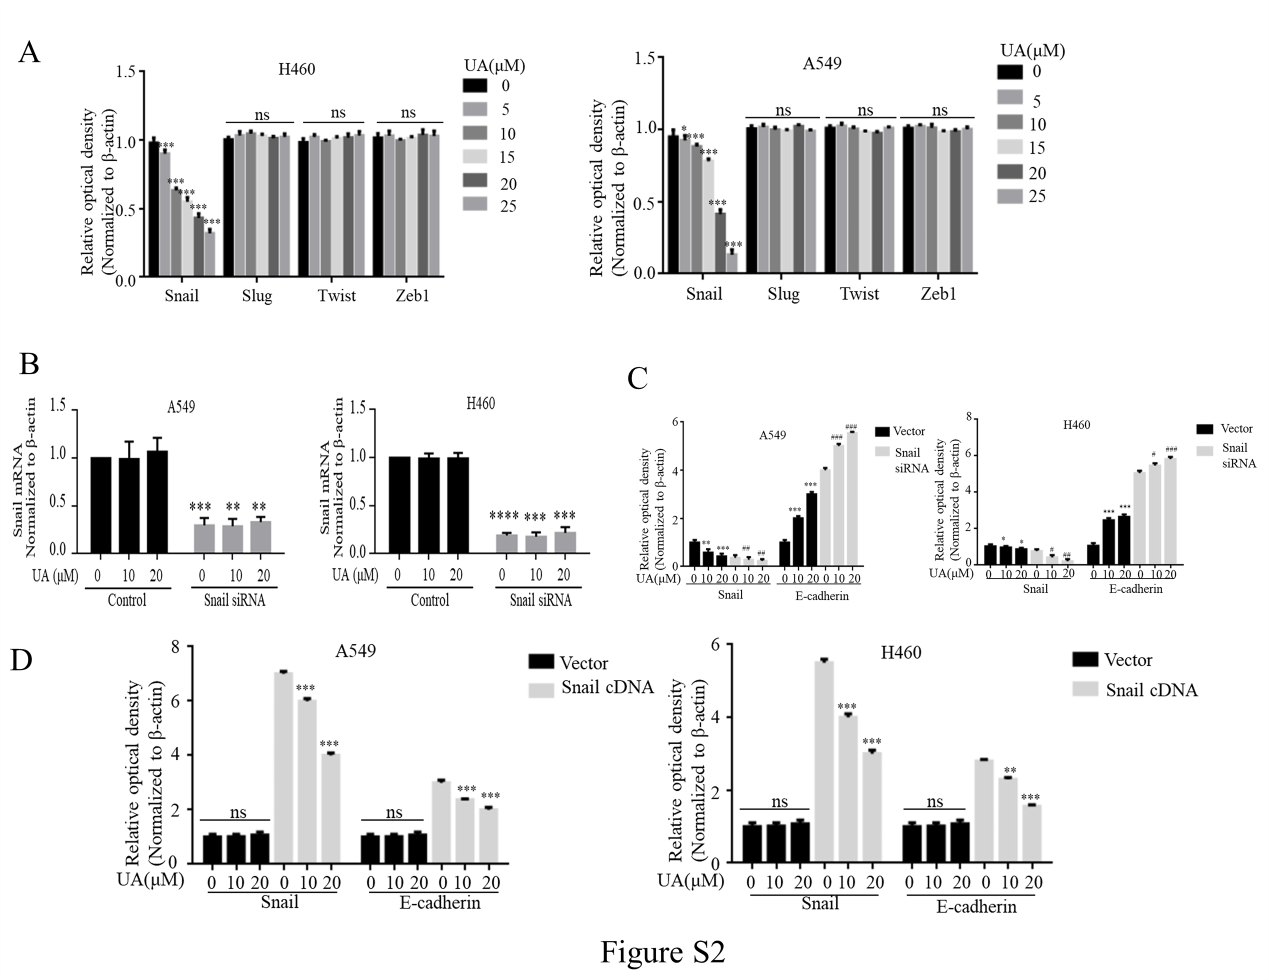


**Figure S2. Quantitative analysis of Figure 2 Western blotting and Snail mRNA level.**

(A) Related to Figure 2A. Quantitative optical density analysis of the Snail, Slug, Twist and Zeb1 by treated with urolithin A for 5 h in A549 and H460 cells. (B) Related to Figure 2B. After Snail siRNA treatment, the level of Snail mRNA was detected by real time qRT-PCR assay. (C) Related to Figure 2B. Quantitative optical density analysis of the expression levels of Snail and E-cadherin after transfection Snail siRNA. (* for difference from control cells; # for difference from control siRNA-transfected cells). (D) Related to Figure 2C. Quantitative optical density analysis of the expression levels of Snail and E-cadherin after transfection Snail cDNA. (* for difference from control cells; # for difference from empty control plasmid). The bars represent the mean±S.D. of triplicates,*p＜0.05, **p＜0.01, ***p＜0.001; #p＜0.05, ##p＜0.01###,p＜0.001. ns means no statistical difference.

**
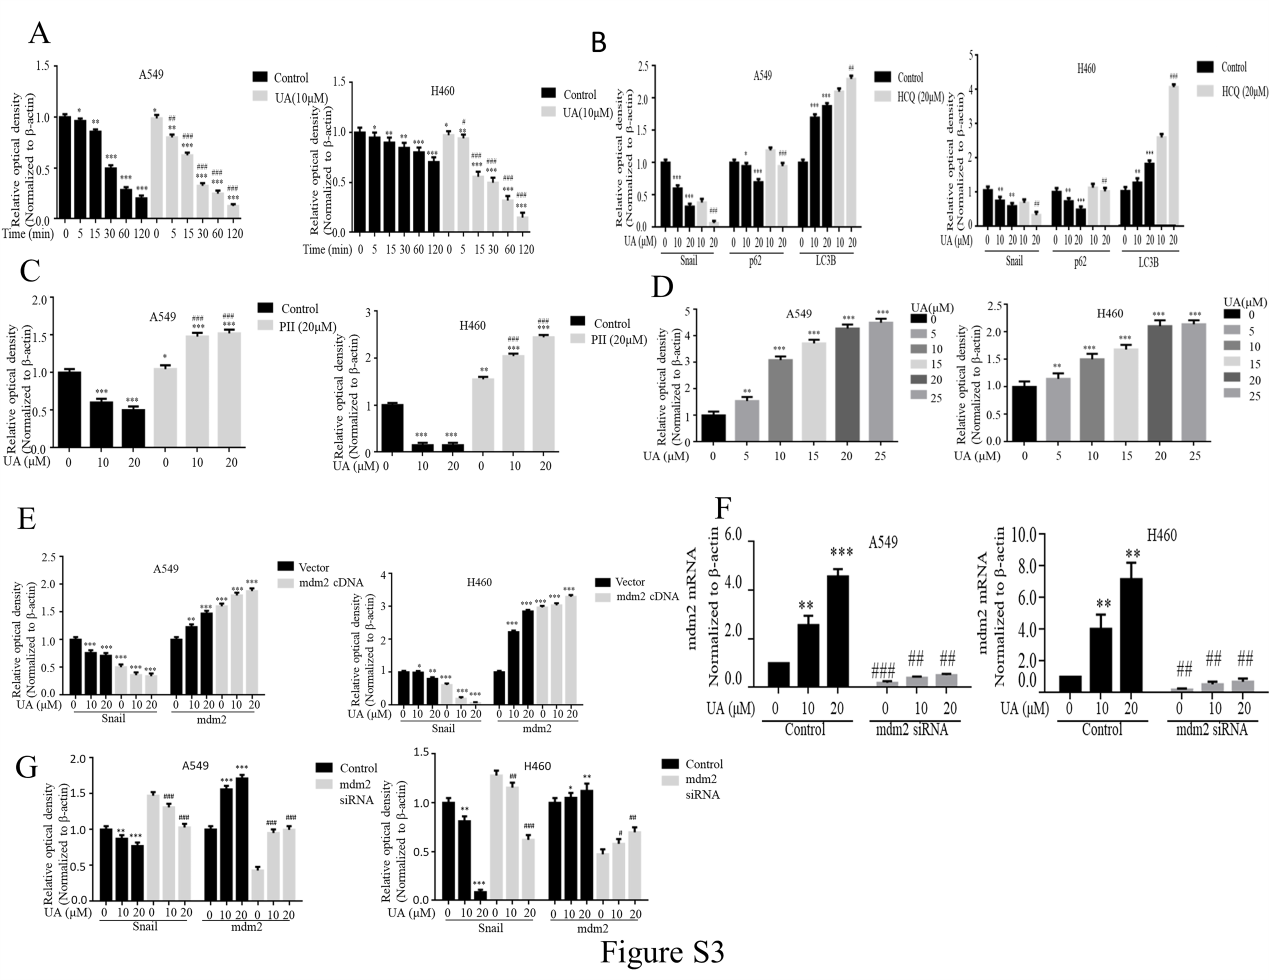
**

**Figure S3. Quantitative analysis of Figure 3 Western blotting and mdm2 mRNA level.**

(A) Related to Figure 3C. Quantitative optical density analysis of Snail expression pretreated or untreated with CHX in the presence of urolithin A (10μM) (* for difference from control cells; # for difference from treated with urolithin A or untreated). (B)Related to Figure 3D. Quantitative optical density analysis of Snail, p62 and LC3A/B expression pretreated or untreated with PII (20μM) in the presence of urolithin A (10,20μM) (* for difference from control cells; # for difference from treated with PII (20μM) or untreated). (C)Related to Figure 3E. Quantitative optical density analysis of Snail expression in the presence of urolithin A (0,10,20μM) and pretreated with PII (20μM) or untreated (* for difference from control cells; # for difference from treated with PII (20μM) or untreated). (D) Related to Figure 3G. Quantitative optical density analysis of mdm2 expression by treated with urolithin A for 5 h. (E) Related to Figure 3H. Quantitative optical density analysis of the expression levels of Snail and mdm2 after transfection mdm2 cDNA. (* for difference from control cells; # for difference from empty control plasmid). (F) Related to Figure 3I. After mdm2 siRNA treatment, the level of mdm2 mRNA was detected by real time qRT-PCR analysis. (G) Related to Figure 3I. Quantitative optical density analysis of the expression levels of Snail and mdm2 after transfection mdm2 siRNA. (* for difference from control cells; # for difference from control siRNA-transfected cells). The bars represent the mean±S.D. of triplicates,*p＜0.05, **p＜0.01, ***p＜0.001; #p＜0.05, ##p＜0.01###p＜0.001.


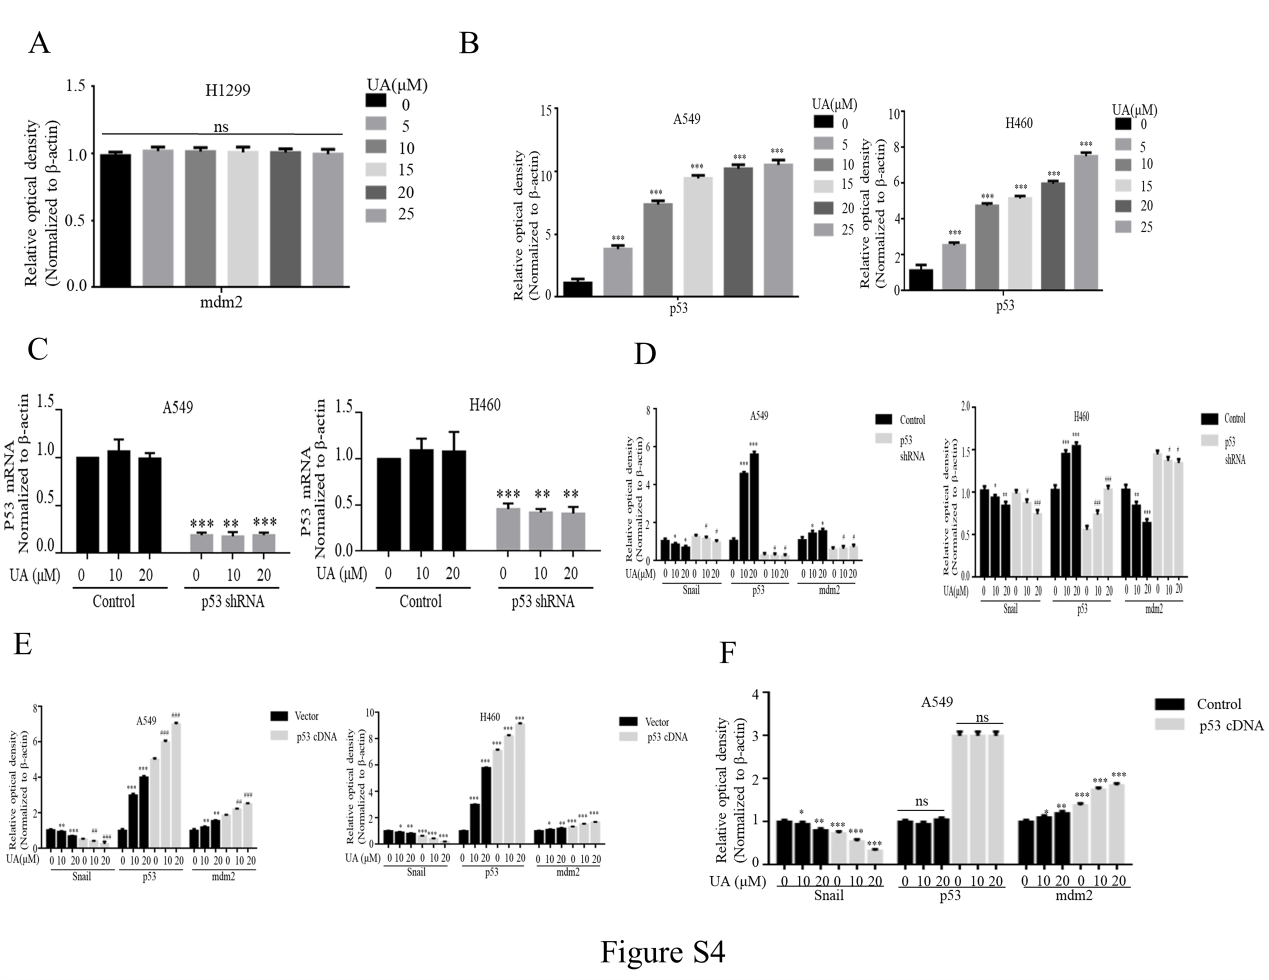


**Figure S4. Quantitative analysis of Figure 4 Western blotting and p53 mRNA level.**

(A) Related to Figure 4A. Quantitative optical density analysis of the mdm2 by treated with urolithin A for 5 h on H1299 cells. (B) Related to Figure 4B.Quantitative optical density analysis of the p53 by treated with urolithin A for 5 h on A549 and H460 cells.(C) Related to Figure 4D. After p53 shRNA treatment, the level of p53 mRNA was detected by real time qRT-PCR analysis. (D) Related to Figure 4D. Quantitative optical density analysis of the expression levels of Snail, p53 and mdm2 after transfection p53 shRNA. (* for difference from control cells; # for difference from control shRNA-transfected cells). (E) Related to Figure 4E. Quantitative optical density analysis of the expression levels of Snail ,p53 and mdm2 after transfection p53 cDNA. (* for difference from control cells; # for difference from empty control plasmid). (F) Related to Figure 4F. Quantitative optical density analysis of the expression levels of Snail, p53 and mdm2 after transfection p53 cDNA on H1299 cells. (* for difference from control cells; # for difference from empty control plasmid). The bars represent the mean±S.D. of triplicates,*p＜0.05, **p＜0.01, ***p＜0.001; #p＜0.05, ##p＜0.01###p＜0.001. ns means no statistical difference.
